# Supplementary material for: Transcriptome and Differential Methylation Integration Analysis Identified Important Differential Methylation Annotation Genes and Functional Epigenetic Modules Related to Vitiligo
Source: Front Immunol. 2021 Mar 10;12:587440. doi: 10.3389/fimmu.2021.587440 (PMC8006451; doi:10.3389/fimmu.2021.587440)
Supplement: Supplementary file 1 [file Table_1.xlsx]

## Sheet: Sheet1
hypomethylation-high expression genes
#Term	Database	ID	Input number	Background number	P-Value	Corrected P-Value	Input	Hyperlink
NF-kappa B signaling pathway	KEGG PATHWAY	hsa04064	2	100	0.000611348	0.0290484	598|5743	http://www.genome.jp/kegg-bin/show_pathway?hsa04064/hsa:5743%09red/hsa:598%09red
Jak-STAT signaling pathway	KEGG PATHWAY	hsa04630	2	162	0.00156619	0.0290484	598|3572	http://www.genome.jp/kegg-bin/show_pathway?hsa04630/hsa:3572%09red/hsa:598%09red
Apoptosis - multiple species	KEGG PATHWAY	hsa04215	1	33	0.0122136	0.040712	598	http://www.genome.jp/kegg-bin/show_pathway?hsa04215/hsa:598%09red
Regulation of lipolysis in adipocytes	KEGG PATHWAY	hsa04923	1	55	0.0200425	0.0512365	5743	http://www.genome.jp/kegg-bin/show_pathway?hsa04923/hsa:5743%09red
VEGF signaling pathway	KEGG PATHWAY	hsa04370	1	59	0.0214598	0.0528719	5743	http://www.genome.jp/kegg-bin/show_pathway?hsa04370/hsa:5743%09red
p53 signaling pathway	KEGG PATHWAY	hsa04115	1	72	0.0260527	0.0575189	598	http://www.genome.jp/kegg-bin/show_pathway?hsa04115/hsa:598%09red
EGFR tyrosine kinase inhibitor resistance	KEGG PATHWAY	hsa01521	1	79	0.0285175	0.0587632	598	http://www.genome.jp/kegg-bin/show_pathway?hsa01521/hsa:598%09red
IL-17 signaling pathway	KEGG PATHWAY	hsa04657	1	93	0.0334297	0.0627961	5743	http://www.genome.jp/kegg-bin/show_pathway?hsa04657/hsa:5743%09red
Th17 cell differentiation	KEGG PATHWAY	hsa04659	1	107	0.0383188	0.0696706	3572	http://www.genome.jp/kegg-bin/show_pathway?hsa04659/hsa:3572%09red
TNF signaling pathway	KEGG PATHWAY	hsa04668	1	112	0.0400594	0.0724478	5743	http://www.genome.jp/kegg-bin/show_pathway?hsa04668/hsa:5743%09red
Apoptosis	KEGG PATHWAY	hsa04210	1	136	0.0483734	0.0810195	598	http://www.genome.jp/kegg-bin/show_pathway?hsa04210/hsa:598%09red
NOD-like receptor signaling pathway	KEGG PATHWAY	hsa04621	1	178	0.0627622	0.0944211	598	http://www.genome.jp/kegg-bin/show_pathway?hsa04621/hsa:598%09red
Ras signaling pathway	KEGG PATHWAY	hsa04014	1	232	0.0809654	0.11236	598	http://www.genome.jp/kegg-bin/show_pathway?hsa04014/hsa:598%09red
PI3K-Akt signaling pathway	KEGG PATHWAY	hsa04151	1	354	0.120889	0.148384	598	http://www.genome.jp/kegg-bin/show_pathway?hsa04151/hsa:598%09red
--------------------
#Term	Database	ID	Input number	Background number	P-Value	Corrected P-Value	Input	Hyperlink
positive regulation of programmed cell death	Gene Ontology	GO:0043068	2	104	0.000659939	0.0290484	598|5743	http://amigo.geneontology.org/amigo/term/GO:0043068
oxidation-reduction process	Gene Ontology	GO:0055114	2	174	0.00180007	0.0290484	57016|3572	http://amigo.geneontology.org/amigo/term/GO:0055114
oxidoreductase activity, acting on single donors with incorporation of molecular oxygen, incorporation of two atoms of oxygen	Gene Ontology	GO:0016702	1	5	0.00216548	0.0290484	5743	http://amigo.geneontology.org/amigo/term/GO:0016702
positive regulation of reactive oxygen species biosynthetic process	Gene Ontology	GO:1903428	1	6	0.00252597	0.0290484	5743	http://amigo.geneontology.org/amigo/term/GO:1903428
regulation of cell aging	Gene Ontology	GO:0090342	1	7	0.00288634	0.0290484	3159	http://amigo.geneontology.org/amigo/term/GO:0090342
response to vitamin D	Gene Ontology	GO:0033280	1	7	0.00288634	0.0290484	5743	http://amigo.geneontology.org/amigo/term/GO:0033280
positive regulation of fatty acid metabolic process	Gene Ontology	GO:0045923	1	8	0.00324658	0.0290484	5743	http://amigo.geneontology.org/amigo/term/GO:0045923
regulation of acute inflammatory response	Gene Ontology	GO:0002673	1	9	0.00360671	0.0291972	3572	http://amigo.geneontology.org/amigo/term/GO:0002673
positive regulation of T cell proliferation	Gene Ontology	GO:0042102	1	17	0.00648338	0.0363837	3572	http://amigo.geneontology.org/amigo/term/GO:0042102
autophagy	Gene Ontology	GO:0006914	1	89	0.0320286	0.0618475	598	http://amigo.geneontology.org/amigo/term/GO:0006914
lipid biosynthetic process	Gene Ontology	GO:0008610	1	92	0.0330796	0.0624836	5743	http://amigo.geneontology.org/amigo/term/GO:0008610
transmembrane receptor protein tyrosine kinase signaling pathway	Gene Ontology	GO:0007169	1	92	0.0330796	0.0624836	9961	http://amigo.geneontology.org/amigo/term/GO:0007169
regulation of cell migration	Gene Ontology	GO:0030334	1	99	0.0355279	0.0663707	5743	http://amigo.geneontology.org/amigo/term/GO:0030334
oxidoreductase activity	Gene Ontology	GO:0016491	1	121	0.043185	0.0760772	5743	http://amigo.geneontology.org/amigo/term/GO:0016491
regulation of cell cycle	Gene Ontology	GO:0051726	1	134	0.0476831	0.0810195	5743	http://amigo.geneontology.org/amigo/term/GO:0051726
regulation of apoptotic process	Gene Ontology	GO:0042981	1	210	0.0735893	0.105571	3572	http://amigo.geneontology.org/amigo/term/GO:0042981
regulation of programmed cell death	Gene Ontology	GO:0043067	1	237	0.0826341	0.113289	598	http://amigo.geneontology.org/amigo/term/GO:0043067
response to stimulus	Gene Ontology	GO:0050896	2	1343	0.083112	0.113486	10561|5743	http://amigo.geneontology.org/amigo/term/GO:0050896
nitrogen compound transport	Gene Ontology	GO:0071705	1	325	0.111548	0.138924	9961	http://amigo.geneontology.org/amigo/term/GO:0071705
cellular metabolic process	Gene Ontology	GO:0044237	2	1718	0.125941	0.153477	115294|3572	http://amigo.geneontology.org/amigo/term/GO:0044237
regulation of biological process	Gene Ontology	GO:0050789	2	1778	0.133249	0.161802	598|3572	http://amigo.geneontology.org/amigo/term/GO:0050789
hypermethylation-low expression genes
#Term	Database	ID	Input number	Background number	P-Value	Corrected P-Value	Input	Hyperlink
Glucagon signaling pathway	KEGG PATHWAY	hsa04922	3	106	0.000171264	0.00671356	AKT1|PYGB|PFKL	http://www.genome.jp/kegg-bin/show_pathway?hsa04922/hsa:5211%09red/hsa:207%09red/hsa:5834%09red
NOD-like receptor signaling pathway	KEGG PATHWAY	hsa04621	3	178	0.000754577	0.0183999	HSP90AA1|IFI16|DNM1L	http://www.genome.jp/kegg-bin/show_pathway?hsa04621/hsa:10059%09red/hsa:3428%09red/hsa:3320%09red
Melanogenesis	KEGG PATHWAY	hsa04916	2	101	0.00460594	0.0617718	MC1R|TYRP1	http://www.genome.jp/kegg-bin/show_pathway?hsa04916/hsa:7306%09red/hsa:4157%09red
Insulin resistance	KEGG PATHWAY	hsa04931	2	108	0.00523369	0.0617718	AKT1|PYGB	http://www.genome.jp/kegg-bin/show_pathway?hsa04931/hsa:5834%09red/hsa:207%09red
TNF signaling pathway	KEGG PATHWAY	hsa04668	2	112	0.00560907	0.0617718	AKT1|DNM1L	http://www.genome.jp/kegg-bin/show_pathway?hsa04668/hsa:10059%09red/hsa:207%09red
Thyroid hormone signaling pathway	KEGG PATHWAY	hsa04919	2	119	0.00629482	0.0617718	AKT1|HDAC2	http://www.genome.jp/kegg-bin/show_pathway?hsa04919/hsa:207%09red/hsa:3066%09red
AMPK signaling pathway	KEGG PATHWAY	hsa04152	2	120	0.00639576	0.0617718	AKT1|PFKL	http://www.genome.jp/kegg-bin/show_pathway?hsa04152/hsa:5211%09red/hsa:207%09red
Apoptosis	KEGG PATHWAY	hsa04210	2	136	0.00811013	0.0644305	PTPN13|AKT1	http://www.genome.jp/kegg-bin/show_pathway?hsa04210/hsa:207%09red/hsa:5783%09red
Insulin signaling pathway	KEGG PATHWAY	hsa04910	2	137	0.00822342	0.0644305	AKT1|PYGB	http://www.genome.jp/kegg-bin/show_pathway?hsa04910/hsa:5834%09red/hsa:207%09red
Phagosome	KEGG PATHWAY	hsa04145	2	152	0.0100075	0.066266	ATP6V0E2|STX7	http://www.genome.jp/kegg-bin/show_pathway?hsa04145/hsa:155066%09red/hsa:8417%09red
Cellular senescence	KEGG PATHWAY	hsa04218	2	160	0.011023	0.0711177	AKT1|CDK1	http://www.genome.jp/kegg-bin/show_pathway?hsa04218/hsa:983%09red/hsa:207%09red
Focal adhesion	KEGG PATHWAY	hsa04510	2	199	0.0165842	0.0773931	PIP5K1C|AKT1	http://www.genome.jp/kegg-bin/show_pathway?hsa04510/hsa:207%09red/hsa:23396%09red
Notch signaling pathway	KEGG PATHWAY	hsa04330	1	48	0.0467073	0.123378	HDAC2	http://www.genome.jp/kegg-bin/show_pathway?hsa04330/hsa:3066%09red
PI3K-Akt signaling pathway	KEGG PATHWAY	hsa04151	2	354	0.0473955	0.124859	AKT1|HSP90AA1	http://www.genome.jp/kegg-bin/show_pathway?hsa04151/hsa:3320%09red/hsa:207%09red
Regulation of lipolysis in adipocytes	KEGG PATHWAY	hsa04923	1	55	0.0532025	0.134725	AKT1	http://www.genome.jp/kegg-bin/show_pathway?hsa04923/hsa:207%09red
VEGF signaling pathway	KEGG PATHWAY	hsa04370	1	59	0.0568945	0.138354	AKT1	http://www.genome.jp/kegg-bin/show_pathway?hsa04370/hsa:207%09red
p53 signaling pathway	KEGG PATHWAY	hsa04115	1	72	0.0687961	0.157524	CDK1	http://www.genome.jp/kegg-bin/show_pathway?hsa04115/hsa:983%09red
PPAR signaling pathway	KEGG PATHWAY	hsa03320	1	76	0.0724284	0.161318	FABP5	http://www.genome.jp/kegg-bin/show_pathway?hsa03320/hsa:2171%09red
IL-17 signaling pathway	KEGG PATHWAY	hsa04657	1	93	0.0877111	0.180582	HSP90AA1	http://www.genome.jp/kegg-bin/show_pathway?hsa04657/hsa:3320%09red
T cell receptor signaling pathway	KEGG PATHWAY	hsa04660	1	103	0.0965851	0.19436	AKT1	http://www.genome.jp/kegg-bin/show_pathway?hsa04660/hsa:207%09red
Jak-STAT signaling pathway	KEGG PATHWAY	hsa04630	1	162	0.147243	0.251829	AKT1	http://www.genome.jp/kegg-bin/show_pathway?hsa04630/hsa:207%09red
cAMP signaling pathway	KEGG PATHWAY	hsa04024	1	214	0.18957	0.294887	AKT1	http://www.genome.jp/kegg-bin/show_pathway?hsa04024/hsa:207%09red
MAPK signaling pathway	KEGG PATHWAY	hsa04010	1	295	0.251428	0.362352	AKT1	http://www.genome.jp/kegg-bin/show_pathway?hsa04010/hsa:207%09red
--------------------
#Term	Database	ID	Input number	Background number	P-Value	Corrected P-Value	Input	Hyperlink
autophagy	Gene Ontology	GO:0006914	2	110	0.00541988	0.0617718	AKT1|HSP90AA1	http://amigo.geneontology.org/amigo/term/GO:0006914
melanosome transport	Gene Ontology	GO:0032402	1	5	0.0058378	0.0617718	MYO5A	http://amigo.geneontology.org/amigo/term/GO:0032402
NAD-dependent protein deacetylase activity	Gene Ontology	GO:0034979	1	5	0.0058378	0.0617718	HDAC2	http://amigo.geneontology.org/amigo/term/GO:0034979
NAD-dependent histone deacetylase activity	Gene Ontology	GO:0017136	1	5	0.0058378	0.0617718	HDAC2	http://amigo.geneontology.org/amigo/term/GO:0017136
polymeric cytoskeletal fiber	Gene Ontology	GO:0099513	2	116	0.00599646	0.0617718	DNM1L|KIF23	http://amigo.geneontology.org/amigo/term/GO:0099513
protein serine/threonine kinase activity	Gene Ontology	GO:0004674	2	117	0.00609517	0.0617718	LIMK2|AKT1	http://amigo.geneontology.org/amigo/term/GO:0004674
positive regulation of reactive oxygen species biosynthetic process	Gene Ontology	GO:1903428	1	6	0.00680751	0.0617718	AKT1	http://amigo.geneontology.org/amigo/term/GO:1903428
melanocyte differentiation	Gene Ontology	GO:0030318	1	6	0.00680751	0.0617718	MYO5A	http://amigo.geneontology.org/amigo/term/GO:0030318
response to oxidative stress	Gene Ontology	GO:0006979	2	166	0.0118132	0.0719067	AKT1|HDAC2	http://amigo.geneontology.org/amigo/term/GO:0006979
cellular pigmentation	Gene Ontology	GO:0033059	1	13	0.0135695	0.0747085	TYRP1	http://amigo.geneontology.org/amigo/term/GO:0033059
regulation of release of cytochrome c from mitochondria	Gene Ontology	GO:0090199	1	13	0.0135695	0.0747085	DNM1L	http://amigo.geneontology.org/amigo/term/GO:0090199
melanin metabolic process	Gene Ontology	GO:0006582	1	13	0.0135695	0.0747085	MYO5A	http://amigo.geneontology.org/amigo/term/GO:0006582
melanin biosynthetic process	Gene Ontology	GO:0042438	1	14	0.0145318	0.0754752	TYRP1	http://amigo.geneontology.org/amigo/term/GO:0042438
cyclin-dependent protein serine/threonine kinase activity	Gene Ontology	GO:0004693	1	14	0.0145318	0.0754752	CDK1	http://amigo.geneontology.org/amigo/term/GO:0004693
negative regulation of extrinsic apoptotic signaling pathway	Gene Ontology	GO:2001237	1	15	0.0154932	0.0759963	AKT1	http://amigo.geneontology.org/amigo/term/GO:2001237
cyclin-dependent protein kinase activity	Gene Ontology	GO:0097472	1	18	0.0183718	0.0793144	CDK1	http://amigo.geneontology.org/amigo/term/GO:0097472
mitochondrion organization	Gene Ontology	GO:0007005	2	224	0.0206562	0.0819558	AKT1|NDUFV1	http://amigo.geneontology.org/amigo/term/GO:0007005
cellular response to oxidative stress	Gene Ontology	GO:0034599	2	232	0.0220387	0.0839891	AKT1|ECT2	http://amigo.geneontology.org/amigo/term/GO:0034599
